# Supplementary material
Source: PubMed Central journal article supplement (PMC3483066)
Supplement: Supp_Fig1.pdf [file Supp_Fig1.pdf]

## Supplementary Data

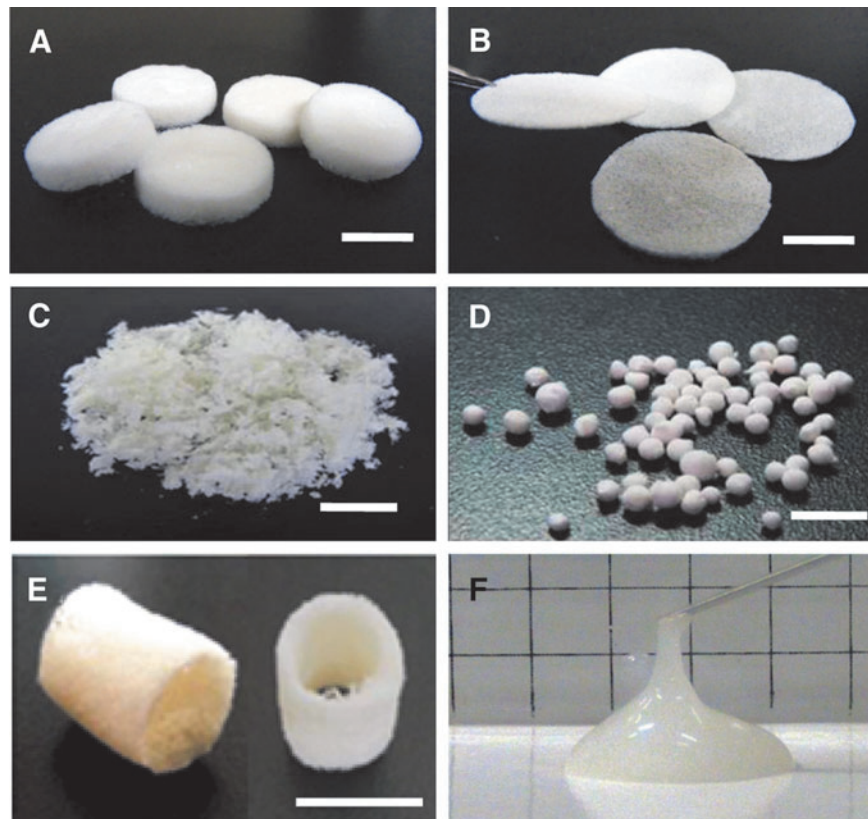

**SUPPLEMENTARY FIG. S1.** Three-dimensional scaffolds with a variety of macroscopic shapes prepared from decellularized porcine adipose tissue-derived extracellular matrix (ECM). (A) Sponges, (B) sheets, (C) powders, (D) beads, (E) hollow tubes, and (F) a gel. Scale bar represents 1 cm.
